# Supplementary material
Source: publisher site journal article supplement (https://www.spandidos-publications.com/3598/downloadSupplementary)

Figure S1. (A) Co-expression analysis of the differentially expressed lncRNA/mRNAs. The yellow circle represents lncRNA, the green circle represents mRNA, and the size of the circle represents the degree of the gene in the network (number of neighbors). The red line indicates a positive correlation, while the blue line indicates a negative correlation. (B) Prediction of the transcription factors for the differentially expressed lncRNA/mRNA. The yellow circle represents lncRNA, the purple circle represents the transcription factor, and the size of the circle represents the degree of the gene in the network (number of neighbors). Inc, long non-coding.

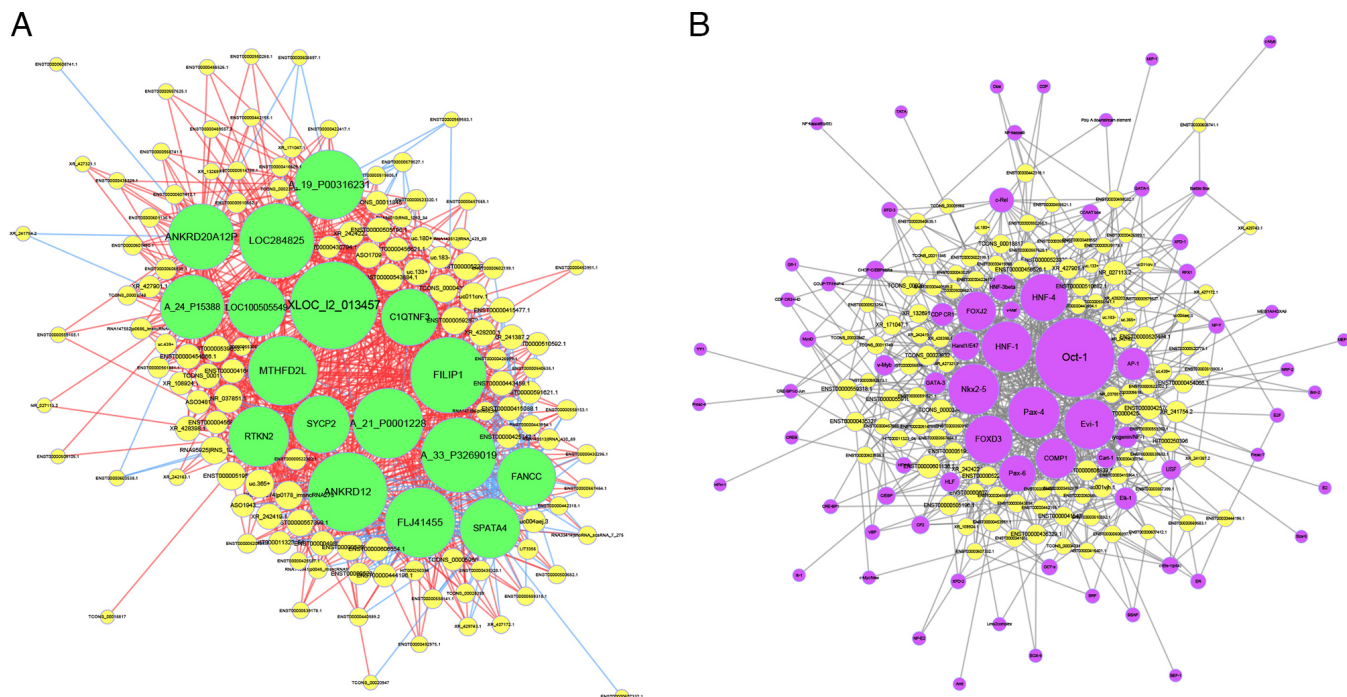

Supplement: Supplementary file 1 [file downloadSupplementary]
